# Supplementary material
Source: PubMed Central journal article supplement (PMC4090144)

# Supplemental Figure 1

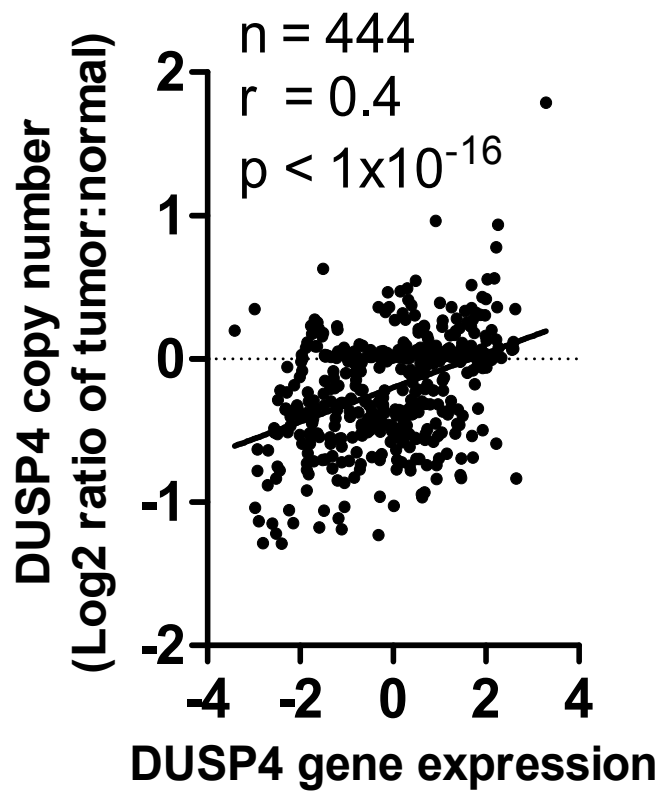

# Supplemental Figure 2

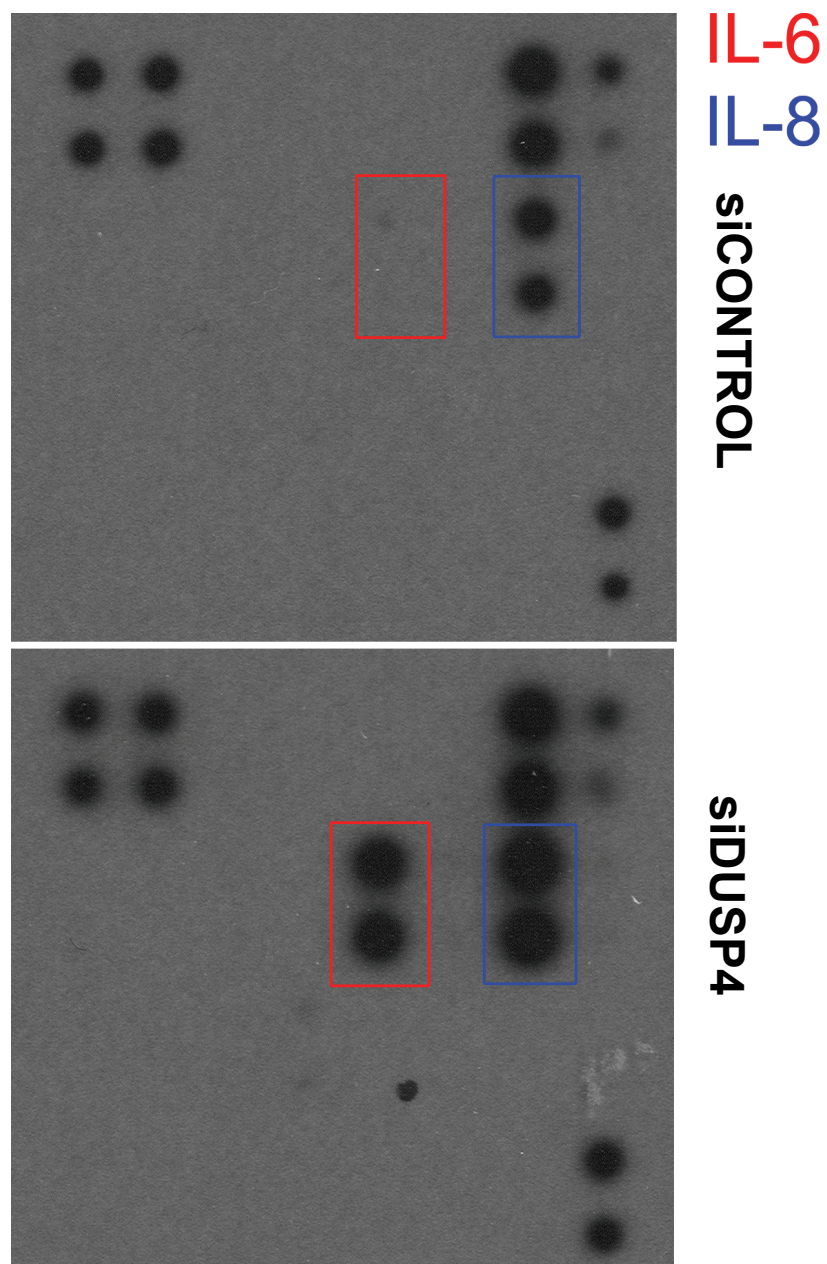

# Supplemental Figure 3

A

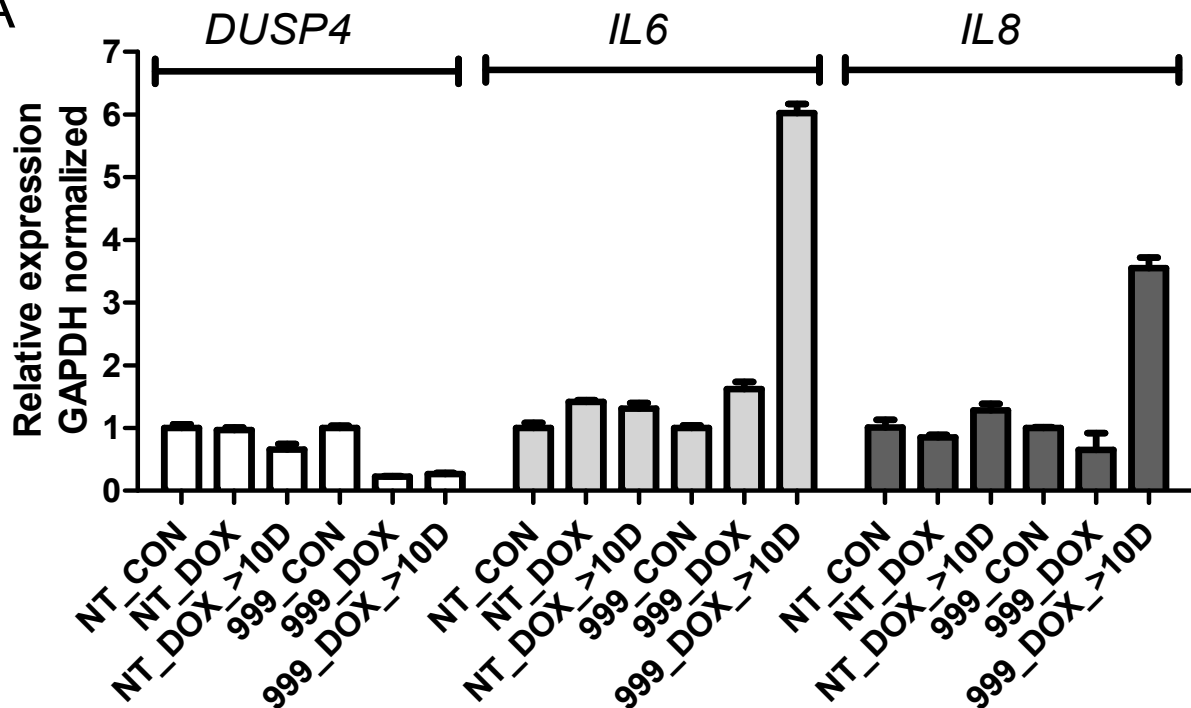

# Supplemental Figure 4

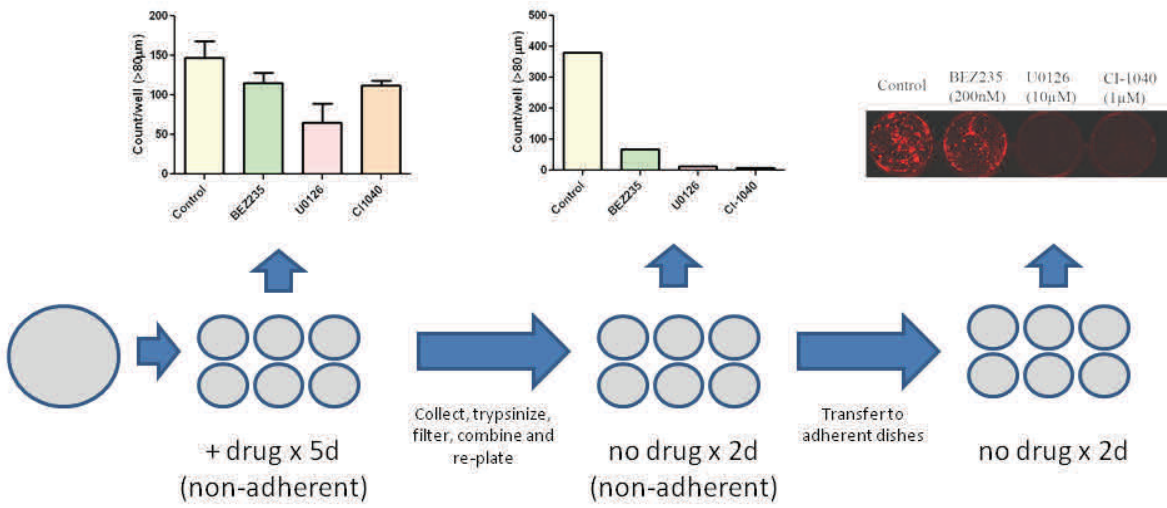

# Supplemental Figure 5

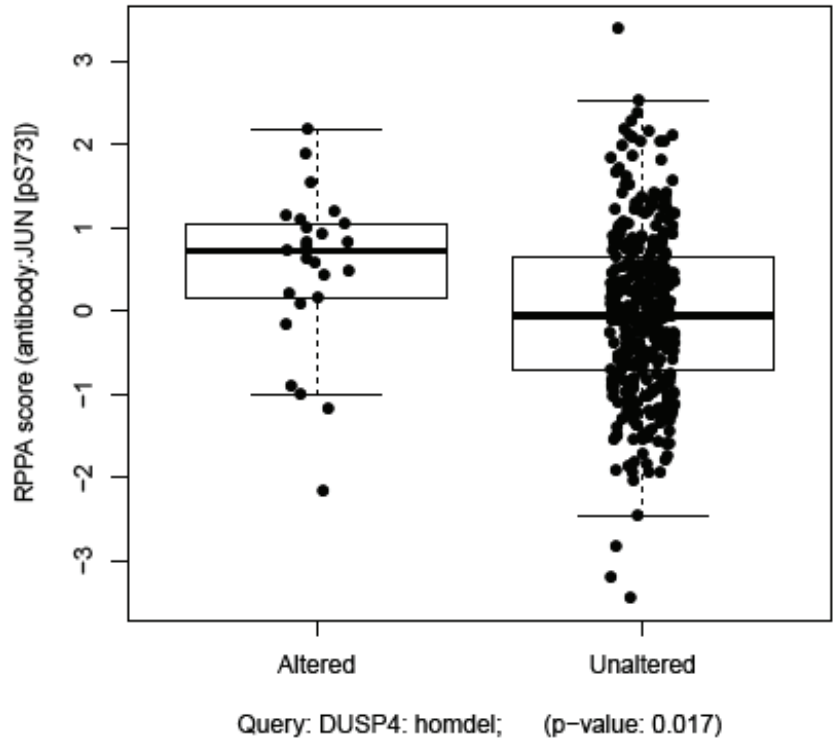

## Supplemental Figure 6

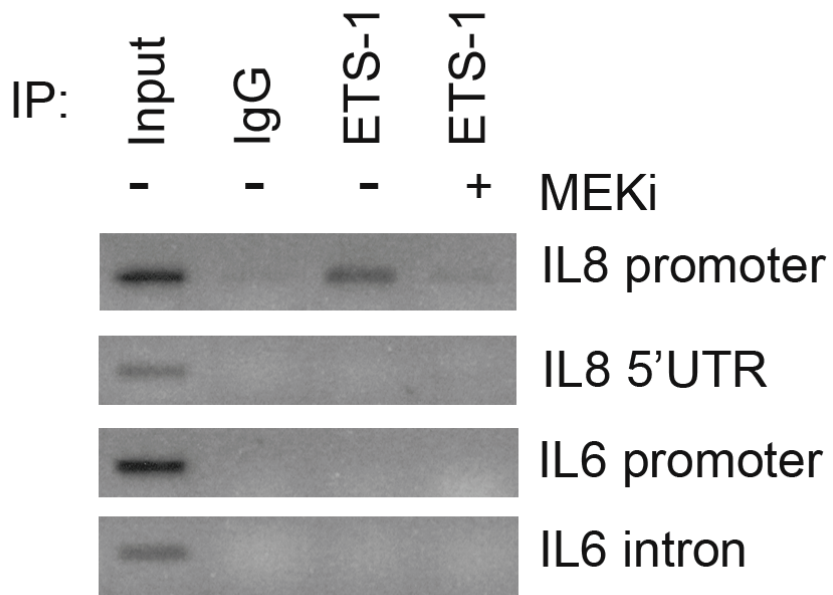

# Supplemental Figure 7

A

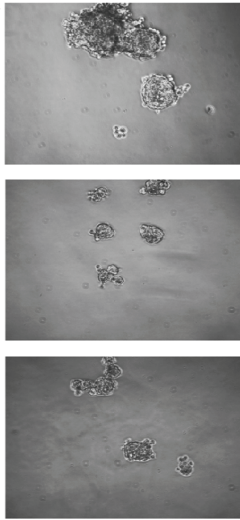

Control

U0126

CI-1040

B

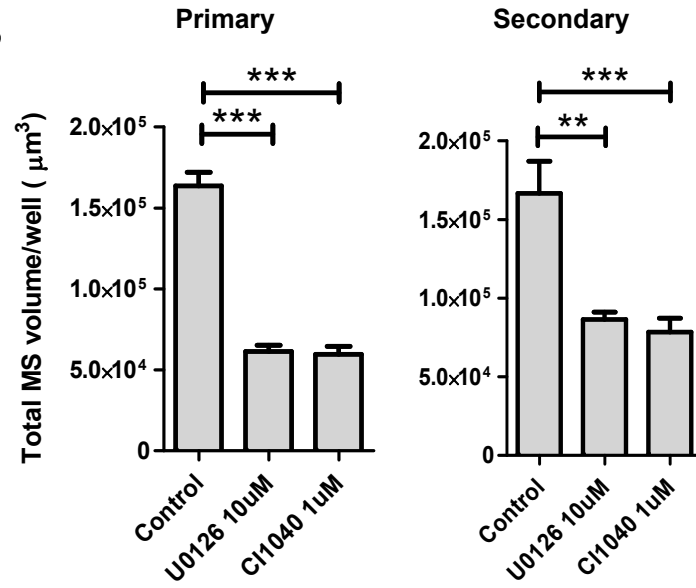

# Supplemental Figure 8

A

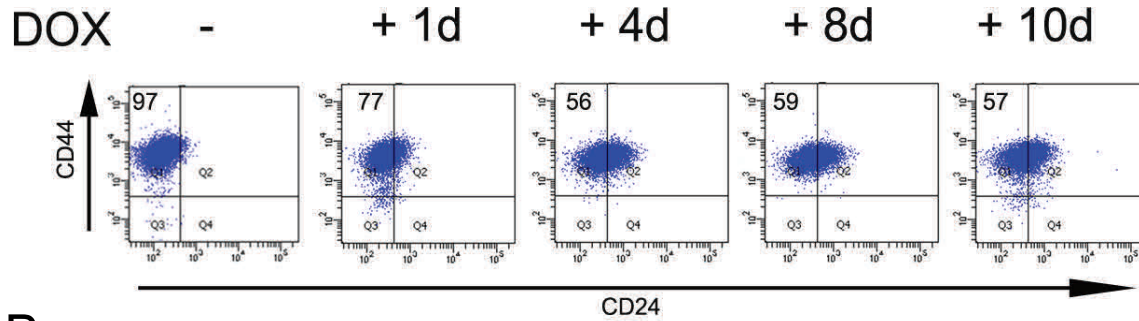

B

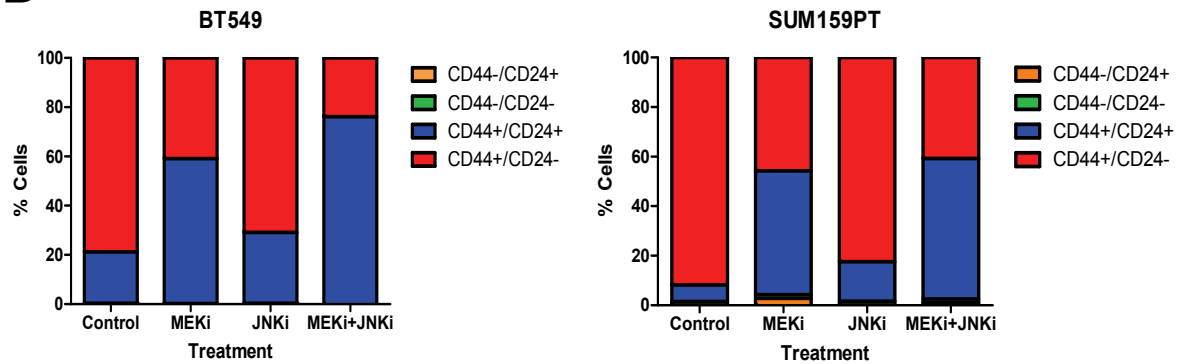

C

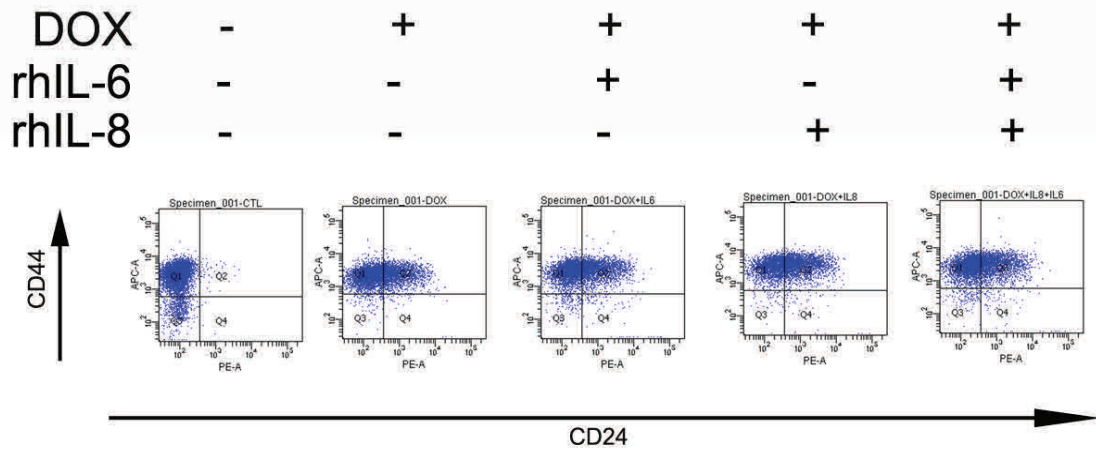



# Supplemental Figure 9

A

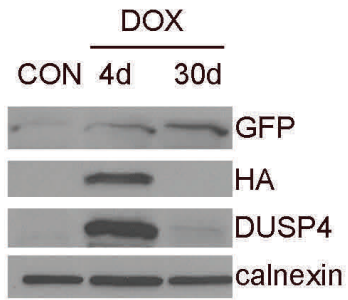

B

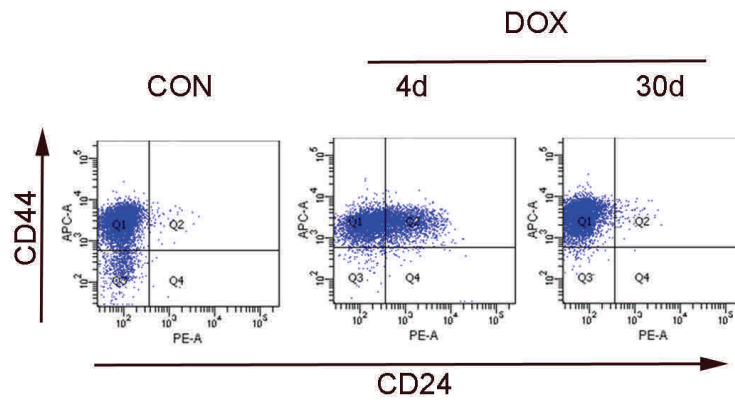

Supplement: NIHMS594969-supplement-Suppl__Data-_figures.pdf [file NIHMS594969-supplement-Suppl__Data-_figures.pdf]
